# Supplementary material for: The dynamics of mucosal-associated invariant T cells in multiple sclerosis
Source: Springerplus. 2016 Aug 5;5(1):1259. doi: 10.1186/s40064-016-2923-9 (PMC4974206; doi:10.1186/s40064-016-2923-9)
Supplement: Supplementary file 2 — 10.1186/s40064-016-2923-9. List of antibodies used in this study. Antibodies are categorized and the name of the clone is indicated. [file 40064_2016_2923_MOESM2_ESM.xlsx]

## Sheet: Table S2
PE labeled phenotyping antibodies used in this study
category	marker	clone	vendor
chemokine receptors	CCR3	5E3	Biolegend
	CCR4	205410	R&D
	CCR5*	HEK/1/85A	Biolegend
	CCR6*	G034E3	Biolegend
	CCR7	150503	R&D
	CCR8	191704	R&D
	CCR9	112509	R&D
	CXCR1	8F1/CXCR1	Biolegend
	CXCR3	49801	R&D
	CXCR4	12G5	Biolegend
	CXCR6	56811	R&D
costimulators / attenuators	CD27*	O323	Biolegend
	CD28*	CD28.2	Biolegend
	CD278 (CTLA-4)	L3D10	Biolegend
	GITR	621	Biolegend
	ICOS*	C398.4A	Biolegend
	CD272	MIH26	Biolegend
	CD279 (PD-1)*	EH12.2H7	Biolegend
cytokine receptors	CD25	BC96	Biolegend
	CD127*	A019D5	Biolegend
	IL-18Rα*	H44	Biolegend
	IL-23R	218213	Biolegend
immuno-regulatory molecules	CD39	A1	Biolegend
	CD73	AD2	Biolegend
	CD137	4B4-1	Biolegend
NK receptors	CD56	39D5	Biolegend
	CD94	DX22	Biolegend
	NKG2D*	1D11	Biolegend
	NKp80	5D12	Biolegend
memory/naïve	CD45RA*	HI100	Biolegend
	CD62L	DREG-56	Biolegend
SLAM family	CD150*	A12(7D4)	Biolegend
	CD244*	C1.7	Biolegend
relevant to MAITs	CD26*	BA5b	Biolegend
	CD243*	UIC2	Biolegend
activation	CD69*	FN50	Biolegend
Fas	CD95	DX2	Biolegend
integrin family	CD49d*	9F10	Biolegend
degranulation	CD107a*	H4A3	Biolegend
*; significantly expressed in ΜΑΙΤ cells
